# Supplementary material for: Variability of Urinary Concentrations of Bisphenol A in Spot Samples, First Morning Voids, and 24-Hour Collections
Source: PubMed Central journal article supplement (PMC3223007; doi:10.1289/ehp.1002701), 2011-03-15

## Supplemental Material

### **Variability of Urinary Concentrations of Bisphenol A in Spot Samples, First-morning Voids, and 24-Hour Collections**

Xiaoyun Ye<sup>1\*</sup>, Lee-Yang Wong<sup>1</sup>, Amber M. Bishop<sup>2</sup>, and Antonia M. Calafat<sup>1</sup>

<sup>1</sup>Division of Laboratory Sciences, National Center for Environmental Health,

Centers for Disease Control and Prevention, Atlanta, GA 30341

4770 Buford Hwy, Mailstop F53,

Atlanta, Georgia 30341, USA

<sup>2</sup> Battelle Memorial Institute

2987 Clairmont Rd St 450

Atlanta, Georgia 30329, USA

Supplemental Material, Table 1. Demographic characteristics of the study participants and logistics of sample collection

(The numbers in parentheses indicate the number of missed collections).

| ID     | Age | Sex | Sampling period (2005) | Total# samples collected | Total# samples missed | Number of samples collected |        |        |        |        |       |        |
|--------|-----|-----|------------------------|--------------------------|-----------------------|-----------------------------|--------|--------|--------|--------|-------|--------|
|        |     |     |                        |                          |                       | Mon                         | Tues   | Wed    | Thur   | Fri    | Sat   | Sun    |
| P1     | 31  | F   | 11/14–11/20            | 63                       | 0                     | 10                          | 7      | 8      | 9      | 11     | 10    | 8      |
| P2     | 25  | F   | 11/14–11/20            | 74                       | 14                    | 15                          | 10 (3) | 14 (1) | 10 (1) | 13 (2) | 8 (3) | 4 (4)  |
| P3     | 59  | F   | 10/29–11/04            | 60                       | 1                     | 8                           | 8      | 8      | 10     | 9      | 10    | 9 (1)  |
| P4     | 27  | F   | 10/31–11/06            | 61                       | 5                     | 6 (2)                       | 8      | 12     | 8      | 10     | 7     | 11 (3) |
| P5     | 34  | M   | 11/14–11/20            | 64                       | 1                     | 8 (1)                       | 7      | 8      | 9      | 10     | 9     | 13     |
| P6     | 26  | M   | 10/31–11/06            | 27                       | 0                     | 4                           | 4      | 4      | 4      | 3      | 4     | 4      |
| P7     | 32  | M   | 11/14–11/20            | 37                       | 2                     | 8                           | 6      | 5      | 5 (1)  | 3 (1)  | 5     | 5      |
| P8     | 32  | M   | 11/14–11/20            | 41                       | 0                     | 7                           | 6      | 5      | 5      | 7      | 5     | 6      |
| TOTAL: |     |     |                        | 427                      | 23                    |                             |        |        |        |        |       |        |

Supplemental Material, Table 2. Normal daily distribution of the urinary concentrations of BPA from spot samples collected per participant based on Shapiro-Wilk statistics.<sup>a</sup>

| Participant | Day of the week |      |     |      |     |     |     |
|-------------|-----------------|------|-----|------|-----|-----|-----|
|             | Mon             | Tues | Wed | Thur | Fri | Sat | Sun |
| P1          | N               | Y    | Y   | N    | Y   | N   | N   |
| P2          | N               | Y    | N   | N    | N   | Y   | N   |
| P3          | N               | Y    | N   | N    | N   | Y   | N   |
| P4          | Y               | N    | N   | Y    | N   | Y   | N   |
| P5          | Y               | N    | Y   | N    | N   | N   | Y   |
| P6          | N               | Y    | Y   | Y    | Y   | Y   | Y   |
| P7          | N               | Y    | N   | N    | Y   | Y   | Y   |
| P8          | Y               | Y    | Y   | Y    | N   | Y   | Y   |

<sup>a</sup>Y and N refer to normal and not normal distributions, respectively. Y for P value > 0.05, N for P value < 0.05

Supplemental Material, Table 3. Variance apportionment of log<sub>10</sub>-transformed creatinine concentration as the outcome in spot urine samples collected from eight persons over a one week period.<sup>a</sup>

| Variance parameter          | Log <sub>10</sub> -transformed creatinine concentration as the outcome |                     |
|-----------------------------|------------------------------------------------------------------------|---------------------|
|                             | Variance component                                                     | % of total variance |
| Between persons             | 0.034                                                                  | 23                  |
| Within person/ between days | 0.0025                                                                 | 2                   |
| Within person/within day    | 0.1081                                                                 | 75                  |

<sup>a</sup>Akaike information criterion (AIC): 302.9

Supplemental Material, Figure 1. Creatinine concentrations (g/mL) for all of the spot urine samples collected from eight participants over one week.

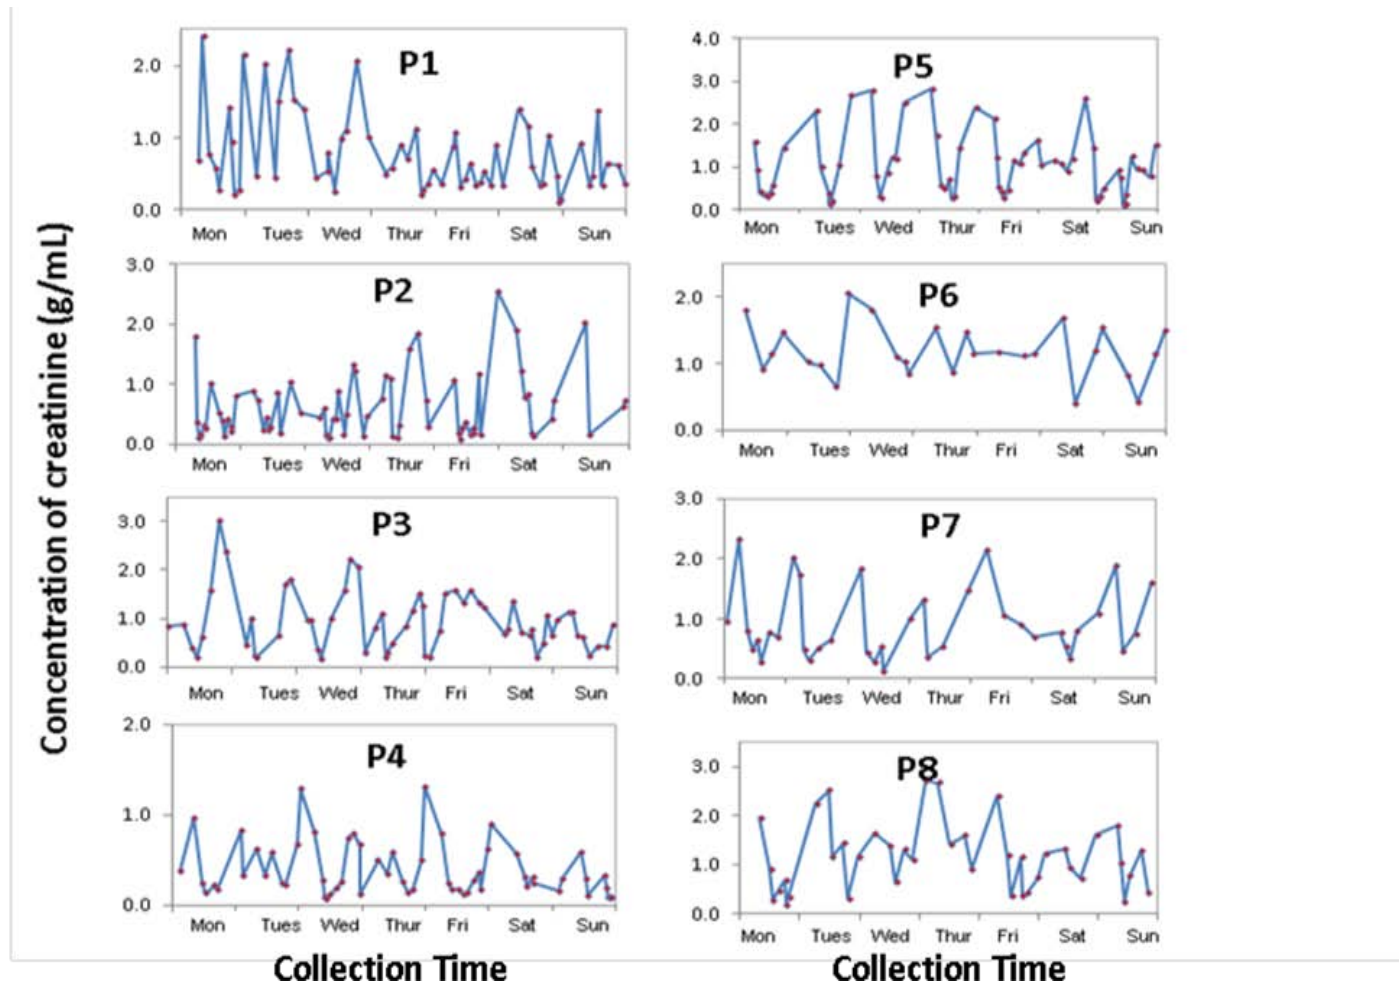

Supplement: ehp.1002701.s001.pdf [file ehp.1002701.s001.pdf]
